# Supplementary material for: Effect of Organization-Directed Workplace Interventions on Physician Burnout: A Systematic Review
Source: PubMed Central journal article supplement — Mayo Clin Proc Innov Qual Outcomes. 2019 Sep 26;3(4):384–408. doi: 10.1016/j.mayocpiqo.2019.07.006 (PMC6978590; doi:10.1016/j.mayocpiqo.2019.07.006), 2019-09-26
Supplement: mmc1.pdf [file mmc1.pdf]

## Supplementary Online Content

**eTable 1. MEDLINE Search (via PubMed)**

**eTable 1. Cochrane Library Search**

**eTable 2. Embase Search**

**eTable 3. Additional MEDLINE Search (via PubMed) with “Lean”**

**eTable 4. Additional Cochrane Library Search with “Lean”**

**eTable 5. Additional Embase Search with “Lean”**

**eTable 7. Supplemental Searches**

**eTable 8. Inclusion/Exclusion Criteria for the Systematic Searches**

**eTable 1. MEDLINE Search (via PubMed)**

| Search No. | Facet                                                                    | Search Terms                                                                                                                                                                                                                               | Search Results<br>(October 3, 2018) |
|------------|--------------------------------------------------------------------------|--------------------------------------------------------------------------------------------------------------------------------------------------------------------------------------------------------------------------------------------|-------------------------------------|
| 1          | Find studies regarding physicians                                        | Search physician*[tiab]                                                                                                                                                                                                                    | 357,549                             |
| 2          | Find studies regarding burnout and stress                                | Search burnout, professional[MeSH]                                                                                                                                                                                                         | 9,912                               |
| 3          |                                                                          | Search (("burnout" OR "job stress" OR "work engagement" OR "psychosocial factors" OR "health outcomes" OR "work behaviors" OR "job performance" OR "job satisfaction" OR "job-person fit" OR "organizational factors" OR "quadruple aim")) | 93,009                              |
| 4          |                                                                          | Search stress                                                                                                                                                                                                                              | 814,346                             |
| 5          |                                                                          | Search ((#2 OR #3 OR #4))                                                                                                                                                                                                                  | 890,903                             |
| 6          |                                                                          | Find studies regarding physicians and burnout or stress                                                                                                                                                                                    | Search ((#1 AND #5))                |
| 7          | Find studies regarding workflow interventions                            | Search work flow[MeSH Terms]                                                                                                                                                                                                               | 3,311                               |
| 8          |                                                                          | Search (("work flow"[tiab] OR workflow[tiab]))                                                                                                                                                                                             | 15,246                              |
| 9          |                                                                          | Search ((time and motion studies[MeSH Terms]))                                                                                                                                                                                             | 4,198                               |
| 10         |                                                                          | Search ((#7 OR #8 OR #9))                                                                                                                                                                                                                  | 20,809                              |
| 11         | Find studies regarding physicians and burnout and workflow interventions | Search ((#6 AND #10))                                                                                                                                                                                                                      | 74                                  |

**eTable 2. Cochrane Library Search**

| <b>Search No.</b> | <b>Facet</b>                                       | <b>Search Terms</b>                                                                                                                                                                                                  | <b>Search Results<br/>(October 3, 2018)</b> |
|-------------------|----------------------------------------------------|----------------------------------------------------------------------------------------------------------------------------------------------------------------------------------------------------------------------|---------------------------------------------|
| 1                 | Find articles on physicians                        | Physician*                                                                                                                                                                                                           | 37,421                                      |
| 2                 | Find articles on burnout or job performance        | Burnout, Professional [MeSH]                                                                                                                                                                                         | 186                                         |
| 3                 |                                                    | Burnout OR "job stress" OR "work engagement" OR "psychosocial factors" OR "health outcomes" OR "work behaviors" OR "job performance" OR "job satisfaction" OR "job-person fit" OR "organizational factors" OR stress | 48,759                                      |
| 4                 |                                                    | #2 OR #3                                                                                                                                                                                                             | 48,759                                      |
| 5                 |                                                    | Combine articles on physicians and burnout                                                                                                                                                                           | #1 AND #4                                   |
| 6                 | Find articles on workflow                          | Workflow [MeSH]                                                                                                                                                                                                      | 46                                          |
| 7                 |                                                    | "Work flow" OR "workflow" OR "time and motion studies"                                                                                                                                                               | 744                                         |
| 8                 |                                                    | Time and Motion Studies [MeSH]                                                                                                                                                                                       | 123                                         |
| 9                 |                                                    | #6 OR #7 OR #8                                                                                                                                                                                                       | 744                                         |
| 10                | Combine articles on physician burnout and workflow | #5 AND #9                                                                                                                                                                                                            | 17                                          |

**eTable 3. EMBASE Search**

| Search No. | Facet                                                   | Search Terms                                                                                                                                                                                                                                                                                                                                                                                                                                                                      | Search Results<br>(October 3, 2018) |
|------------|---------------------------------------------------------|-----------------------------------------------------------------------------------------------------------------------------------------------------------------------------------------------------------------------------------------------------------------------------------------------------------------------------------------------------------------------------------------------------------------------------------------------------------------------------------|-------------------------------------|
| 1          | Find articles on physicians                             | 'physician'/exp OR 'physicians':ab,ti                                                                                                                                                                                                                                                                                                                                                                                                                                             | 862,826                             |
| 2          | Find articles on job burnout                            | 'burnout'/exp OR 'burnout':ab,ti OR 'job stress'/exp OR 'job stress':ab,ti OR 'work engagement'/exp OR 'work engagement':ab,ti OR 'psychosocial factors'/exp OR 'psychosocial factors':ab,ti OR 'health outcomes'/exp OR 'health outcomes':ab,ti OR 'job performance'/exp OR 'job performance':ab,ti OR 'job satisfaction'/exp OR 'job satisfaction':ab,ti OR 'stress'/exp OR 'stress':ab,ti OR 'work behavior':ab,ti OR 'job-person fit':ab,ti OR 'organizational factors':ab,ti | 1,015,043                           |
| 3          | Find articles on physicians and burnout                 | #1 AND #2                                                                                                                                                                                                                                                                                                                                                                                                                                                                         | 33,047                              |
| 4          | Find articles on workflow                               | 'workflow'/exp OR 'workflow':ab,ti OR 'work flow':ab,ti OR 'task performance'/exp OR 'time and motion studies':ab,ti                                                                                                                                                                                                                                                                                                                                                              | 161,572                             |
| 5          | Combine articles on physicians' burnout and workflow    | #3 AND #4                                                                                                                                                                                                                                                                                                                                                                                                                                                                         | 389                                 |
| 6          | Find and limit conference abstracts to last three years | [conference abstract]/lim NOT [2017-2018]/py                                                                                                                                                                                                                                                                                                                                                                                                                                      | 2,597,920                           |
| 7          |                                                         | #5 NOT #6                                                                                                                                                                                                                                                                                                                                                                                                                                                                         | 326                                 |

**eTable 4. Additional MEDLINE Search (via PubMed) with “Lean”**

| Search No. | Facet                                                                             | Search Terms                                                                                                                                                                                                                               | Search Results<br>(October 3, 2018) |
|------------|-----------------------------------------------------------------------------------|--------------------------------------------------------------------------------------------------------------------------------------------------------------------------------------------------------------------------------------------|-------------------------------------|
| 1          | Find studies regarding physicians                                                 | Search physician*[tiab]                                                                                                                                                                                                                    | 357,549                             |
| 2          | Find studies regarding burnout and stress                                         | Search burnout, professional[MeSH]                                                                                                                                                                                                         | 9,912                               |
| 3          |                                                                                   | Search (("burnout" OR "job stress" OR "work engagement" OR "psychosocial factors" OR "health outcomes" OR "work behaviors" OR "job performance" OR "job satisfaction" OR "job-person fit" OR "organizational factors" OR "quadruple aim")) | 93,009                              |
| 4          |                                                                                   | Search stress                                                                                                                                                                                                                              | 814,346                             |
| 5          |                                                                                   | Search ((#2 OR #3 OR #4))                                                                                                                                                                                                                  | 890,903                             |
| 6          |                                                                                   | Find studies regarding physicians and burnout or stress                                                                                                                                                                                    | Search ((#1 AND #5))                |
| 7          | Find studies regarding workflow interventions                                     | Search work flow[MeSH Terms]                                                                                                                                                                                                               | 3,311                               |
| 8          |                                                                                   | Search (("work flow"[tiab] OR workflow[tiab]))                                                                                                                                                                                             | 15,246                              |
| 9          |                                                                                   | Search ((time and motion studies[MeSH Terms]))                                                                                                                                                                                             | 4,198                               |
| 10         |                                                                                   | Search ((#7 OR #8 OR #9))                                                                                                                                                                                                                  | 20,809                              |
| 11         | Find studies regarding Lean interventions, excluding other workflow interventions | Search (lean NOT #10)                                                                                                                                                                                                                      | 35,392                              |
| 12         | Find studies regarding physicians, burnout and Lean interventions                 | Search (#6 AND #11)                                                                                                                                                                                                                        | 13                                  |

**eTable 5. Additional Cochrane Library Search with “Lean”**

| Search no. | Facet                                                                                        | Search Terms                                                                                                                                                                                                                    | Search Results<br>(October 3, 2018) |
|------------|----------------------------------------------------------------------------------------------|---------------------------------------------------------------------------------------------------------------------------------------------------------------------------------------------------------------------------------|-------------------------------------|
| 1          | Find articles on physicians                                                                  | 'physician'/exp OR 'physician*':ab,ti                                                                                                                                                                                           | 879,438                             |
| 2          | Find articles on job burnout                                                                 | 'burnout' OR 'job stress' OR 'work engagement' OR 'psychosocial factors' OR 'health outcomes' OR 'job performance' OR 'job satisfaction' OR 'work behavior*' OR 'job-person fit' OR 'organizational factors' OR 'quadruple aim' | 124,809                             |
| 3          |                                                                                              | Stress                                                                                                                                                                                                                          | 1,043,526                           |
| 4          |                                                                                              | 'professional burnout' OR 'burnout'/exp                                                                                                                                                                                         | 12,688                              |
| 5          |                                                                                              | #2 OR #3 OR #4                                                                                                                                                                                                                  | 1,143,835                           |
| 6          |                                                                                              | Find articles on physicians and burnout                                                                                                                                                                                         | #1 AND #5                           |
| 7          | Find articles on workflow                                                                    | 'workflow'/exp                                                                                                                                                                                                                  | 12,182                              |
| 8          |                                                                                              | 'workflow':ti,ab OR 'work flow':ti,ab                                                                                                                                                                                           | 19,356                              |
| 9          |                                                                                              | 'time and motion studies':ti,ab OR 'task performance'/exp                                                                                                                                                                       | 130,822                             |
| 10         |                                                                                              | #7 OR #8 OR #9                                                                                                                                                                                                                  | 152,627                             |
| 11         | Find articles on 'Lean' not in other articles about 'workflow'                               | 'lean' NOT #10                                                                                                                                                                                                                  | 49,633                              |
| 12         | Combine article on physicians and burnout with 'Lean' not in other articles about 'workflow' | #6 AND #11                                                                                                                                                                                                                      | 47                                  |

**eTable 6. Additional Embase Search with “Lean”**

| Search no. | Facet                                                                                        | Search Terms                                                                                                                                                                                                                    | Search Results<br>(October 3, 2018) |
|------------|----------------------------------------------------------------------------------------------|---------------------------------------------------------------------------------------------------------------------------------------------------------------------------------------------------------------------------------|-------------------------------------|
| 1          | Find articles on physicians                                                                  | Physician*                                                                                                                                                                                                                      | 37,421                              |
| 2          | Find articles on job burnout                                                                 | “Burnout, professional” [MeSH]                                                                                                                                                                                                  | 186                                 |
| 3          |                                                                                              | “burnout” OR “job stress” OR “work engagement” OR “psychosocial factors” OR “health outcomes” OR “work behaviors” OR “job performance” OR “job satisfaction” OR “job-person fit” OR “organizational factors” OR “quadruple aim” | 7,478                               |
| 4          |                                                                                              | Stress                                                                                                                                                                                                                          | 42,766                              |
| 5          |                                                                                              | #2 OR #3 OR #4                                                                                                                                                                                                                  | 48,759                              |
| 6          |                                                                                              | Find articles on physicians and job burnout                                                                                                                                                                                     | #1 AND #5                           |
| 7          | Find articles on workflow                                                                    | “workflow”[MeSH]                                                                                                                                                                                                                | 46                                  |
| 8          |                                                                                              | “work flow” OR “workflow”                                                                                                                                                                                                       | 628                                 |
| 9          |                                                                                              | “Time and Motion Studies” [MeSH]                                                                                                                                                                                                | 123                                 |
| 10         |                                                                                              | #7 OR #8 OR #9                                                                                                                                                                                                                  | 742                                 |
| 11         | Find articles on “lean”                                                                      | “lean”                                                                                                                                                                                                                          | 5,774                               |
| 12         | Find articles on ‘Lean’ not in other articles about ‘workflow’                               | #11 NOT #10                                                                                                                                                                                                                     | 5,768                               |
| 13         | Combine article on physicians and burnout with ‘Lean’ not in other articles about ‘workflow’ | #6 AND #12                                                                                                                                                                                                                      | 41                                  |

## eTable 7. Supplemental Searches

The following conferences and websites of relevant organizations were also searched. Manual searches of bibliographies were also performed to identify additional relevant articles.

| Conference (Year(s))                                 | Relevant Organizations                     |
|------------------------------------------------------|--------------------------------------------|
| WELL-Med Conference (2014, 2016, and 2018)           | Agency for Healthcare Research and Quality |
| American Conference on Physician Health (2017, 2018) | American Medical Association               |
| International Conference on Physician Health (2016)  | American College of Physicians             |
|                                                      | Institute for Healthcare Improvement       |

## eTable 8. Inclusion/Exclusion Criteria for the Systematic Searches

| Inclusion                                                                                                                                                                                                                       | Exclusion                                                                                                                                                                    |
|---------------------------------------------------------------------------------------------------------------------------------------------------------------------------------------------------------------------------------|------------------------------------------------------------------------------------------------------------------------------------------------------------------------------|
| The publication reports on organization-directed interventions for physician burnout that are related to work, the workplace, or workflow.                                                                                      | The publication does not report on organization-directed interventions for physician burnout that are related to work, the workplace, or workflow.                           |
| The publication pertains to physicians (including medical specialties classified according to surgical or internal medicine, age range of patients, diagnostic or therapeutic, and organ-based or technique-based specialists). | The publication does not pertain to physicians or pertains to non-physician healthcare professionals (e.g. nurses, assistants, trainees, caregivers at nursing homes, etc.). |
| The publication is dated within the last 11 years (2007 – 2018).                                                                                                                                                                | The publication is older than the last 11 years (2007 – 2018).                                                                                                               |
| The publication is in English.                                                                                                                                                                                                  | The publication is not in English.                                                                                                                                           |
| The publication reports a primary study, systematic review, or meta-analysis.                                                                                                                                                   | The publication reports a narrative (non-systematic) review, case report, or case series.                                                                                    |
| The publication contains an abstract.                                                                                                                                                                                           | The publication does not contain an abstract.                                                                                                                                |
